# Supplementary material for: Identification of tumor epithelium and stroma in tissue microarrays using texture analysis
Source: Springer Nature journal article supplement (doi:10.1186/1746-1596-7-22), 2012-03-02

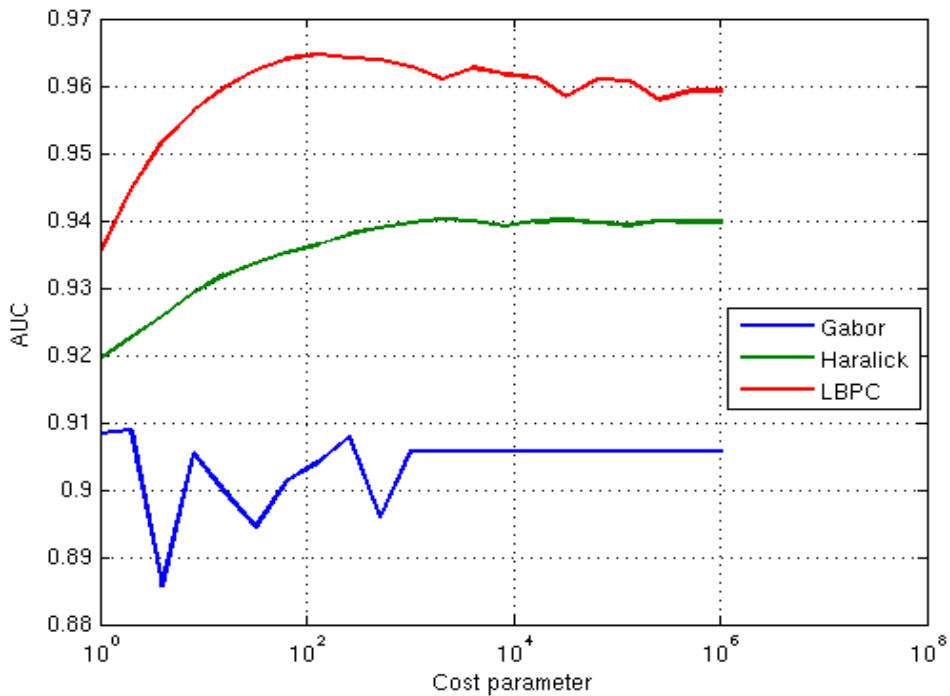

Supplement: 13000_2011_523_MOESM3_ESM.pdf [file 13000_2011_523_MOESM3_ESM.pdf]
